# Supplementary material for: Integration of Insomnia-Related Network Perturbation Reveals Distinct Molecular Subtypes and Therapeutic Vulnerabilities in Breast Cancer
Source: Research Square preprint supplement (doi:10.21203/rs.3.rs-8240898/v1), 2025-12-09
Supplement: Supplementary file 1 [file 08538a64462126c48eee40a6.docx]

**Supplementary Figure legends**

**FigureS1 Consensus clustering analysis and survival validation**

(A, C) Consensus clustering matrices (k=3) using 443 prognostic gene pairs in (A) training set and (C) testing set.

(B, D) Cumulative distribution function (CDF) curves for (B) training set and (D) testing set.

(E-H) Validation of Kaplan-Meier survival analysis in testing set: (E) OS, (F) BCFi, (G) DRFi, (H) RFi.

**FigureS2 Biological function analysis of three subtypes**

1. GO enrichment bar plot for Cluster 3-specific DEGs.

(B-C) KEGG pathway GSEA volcano plots for (B) Cluster 2 and (C) Cluster 3.

(D) ssGSEA score heatmap of 50 Hallmark pathways across subtypes.

**FigureS3 Immune heterogeneity analysis**

(A-D) GSEA volcano plots for (A-B) ImmPort pathways and (C-D) cell-type immune markers in Clusters 2-3.

(E) ssGSEA score heatmap of 17 ImmPort immune pathways.

**FigureS4 Clinical feature validation**

(A-B) Validation of (A) tumor size/recurrence risk differences and (B) tumor microenvironment scores in testing set.

(C-E) Replication of molecular/pathological subtype distributions in testing set.

**FigureS5 Chemotherapy sensitivity validation**

(A) Response rate comparison among testing set subtypes (P-value<0.05, Chi-square test).

(B) Sensitivity differences to 8 chemotherapeutic agents in testing set.

**FigureS6 Dysregulated Hallmark pathways in risk groups**

(A) Volcano plot of DEGs between risk groups (|logFC|>1, P.adj<0.05).

(B) Hallmark pathway GSEA volcano plot.

(C-D) Top 5 (C) suppressed and (D) activated pathways in low-risk group.

**FigureS7 Therapeutic response analysis in risk groups**

(A) Differential response to immune checkpoint inhibitors (Wilcoxon test).

(B) Chemotherapy sensitivity differences between risk groups (Wilcoxon test).
